# Supplementary material for: Selective linear ethylene oligomerization over nickel-containing zeotypes with tetravalent framework heteroatoms
Source: Royal Society of Chemistry journal article supplement (doi:10.1039/d3cy01736b), 2024-01-01
Supplement: d3cy01736b1.pdf [file d3cy01736b1.pdf]

Supporting Information

**Selective Linear Ethylene Oligomerization over Nickel-Containing Zeotypes  
with Tetravalent Framework Heteroatoms**

*Yunfei Bai*<sup>a,b</sup>, *Tomás Cordero-Lanzac*<sup>c</sup>, *Ainara Nova*<sup>c</sup>, *Unni Olsbye*<sup>c</sup>, *Esben Taarning*<sup>a</sup>, *Juan S. Martinez-Espin*<sup>a\*</sup>

<sup>a</sup>Topsoe A/S, Haldor Topsøes Allé 1, 2800 Kongens Lyngby, Denmark

<sup>b</sup>Aarhus University, Nordre Ringgade 1, 8000 Aarhus C, Denmark

<sup>c</sup>Centre for Materials Science and Nanotechnology, Department of Chemistry, University of Oslo, Blindern, 0315 Oslo, Norway

## Table of contents

|                                                                                                                                                                                                                         |    |
|-------------------------------------------------------------------------------------------------------------------------------------------------------------------------------------------------------------------------|----|
| Figure S1 XRD patterns of representative nickel loaded Beta zeotypes.....                                                                                                                                               | 3  |
| Figure S2 N <sub>2</sub> -adsorption/desorption isotherms for: (a) different heteroatom-incorporated Beta zeotypes with 1 wt% nickel loading; and (b) tin-incorporated Beta zeotypes with various nickel loadings. .... | 3  |
| Figure S3 SEM images of representative Beta zeotype supports.....                                                                                                                                                       | 4  |
| Figure S4 IR spectra within C≡N stretching region for CD <sub>3</sub> CN adsorbed over M-Beta zeotypes. ....                                                                                                            | 5  |
| Figure S5 Correlation between exchanged nickel content and (a) tin content of Sn-Beta support, as well as (b) nickel loading of Ni/Sn-Beta catalysts. ....                                                              | 5  |
| Figure S6 FTIR CO vibration region of Si-Beta (heteroatom-free) with and without nickel loading upon CO adsorption at liquid nitrogen temperature. ....                                                                 | 6  |
| Figure S7 Carbon balance calculated based on carbon atoms.....                                                                                                                                                          | 6  |
| Figure S8 Ethylene conversion over Sn-Beta (nickel-free), Ni/Si-Beta (heteroatom free) and Ni/Sn-Beta catalysts. ....                                                                                                   | 7  |
| Figure S9 TOF comparison of Ni/Sn-Beta with various nickel to tin ratios with TOS=60 min.....                                                                                                                           | 7  |
| Figure S10 Butene product distribution obtained from ethylene oligomerization over Ni/M-Beta catalysts. ....                                                                                                            | 8  |
| Figure S11 Results of 1-butene isomerization experiment. ....                                                                                                                                                           | 8  |
| Figure S12 TOF-TOS profiles of catalysts for TPO experiments.....                                                                                                                                                       | 9  |
| Figure S13 Weight change profile of TPO experiments. ....                                                                                                                                                               | 10 |
| <br>                                                                                                                                                                                                                    |    |
| Table S1 Textural properties of representative Ni/M-Beta catalysts. ....                                                                                                                                                | 9  |
| Table S2 Ion exchange capacity of different zeotype supports.....                                                                                                                                                       | 9  |
| Table S3 Total mass loss of catalyst samples after TPO experiments under air atmosphere. ....                                                                                                                           | 10 |

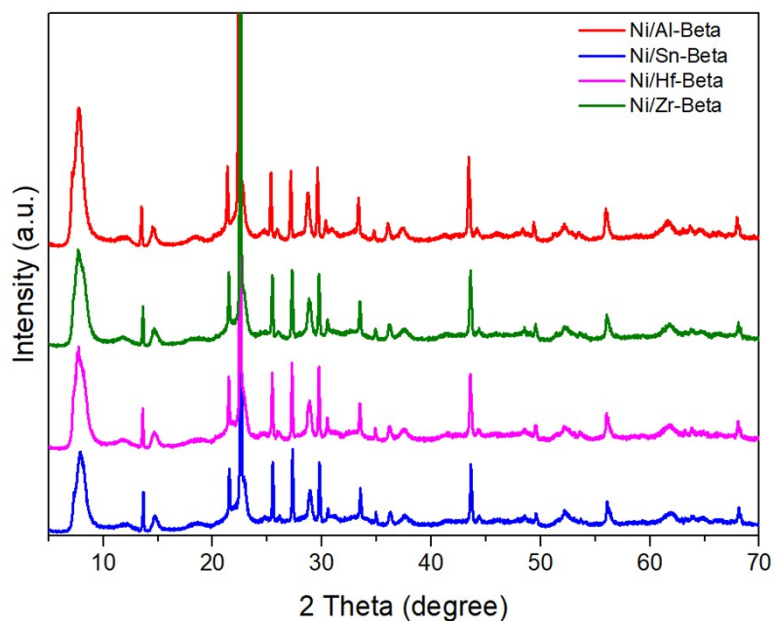

Figure S1 XRD patterns of representative nickel loaded Beta zeotypes.

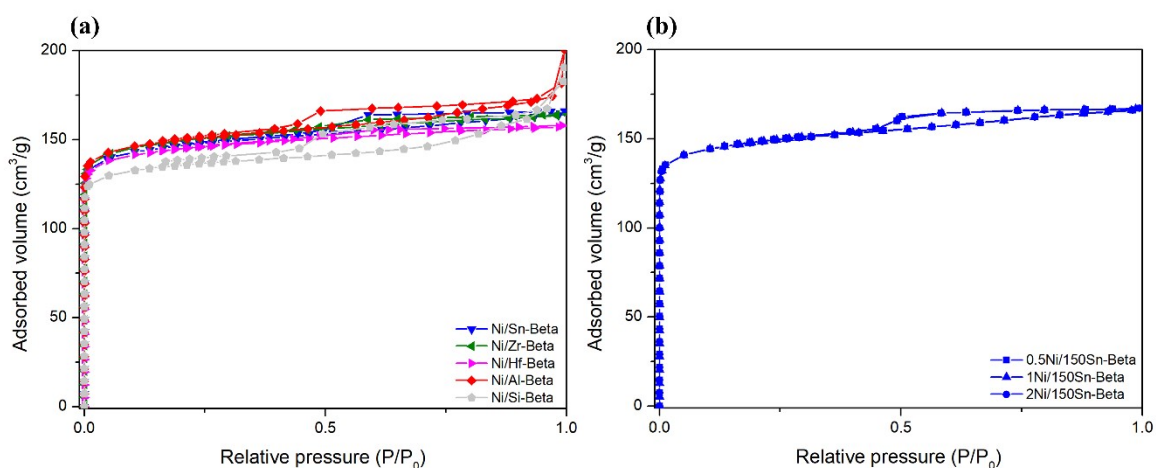

Figure S2 N<sub>2</sub>-adsorption/desorption isotherms for: (a) different heteroatom-incorporated Beta zeotypes with 1 wt% nickel loading; and (b) tin-incorporated Beta zeotypes with various nickel loadings.

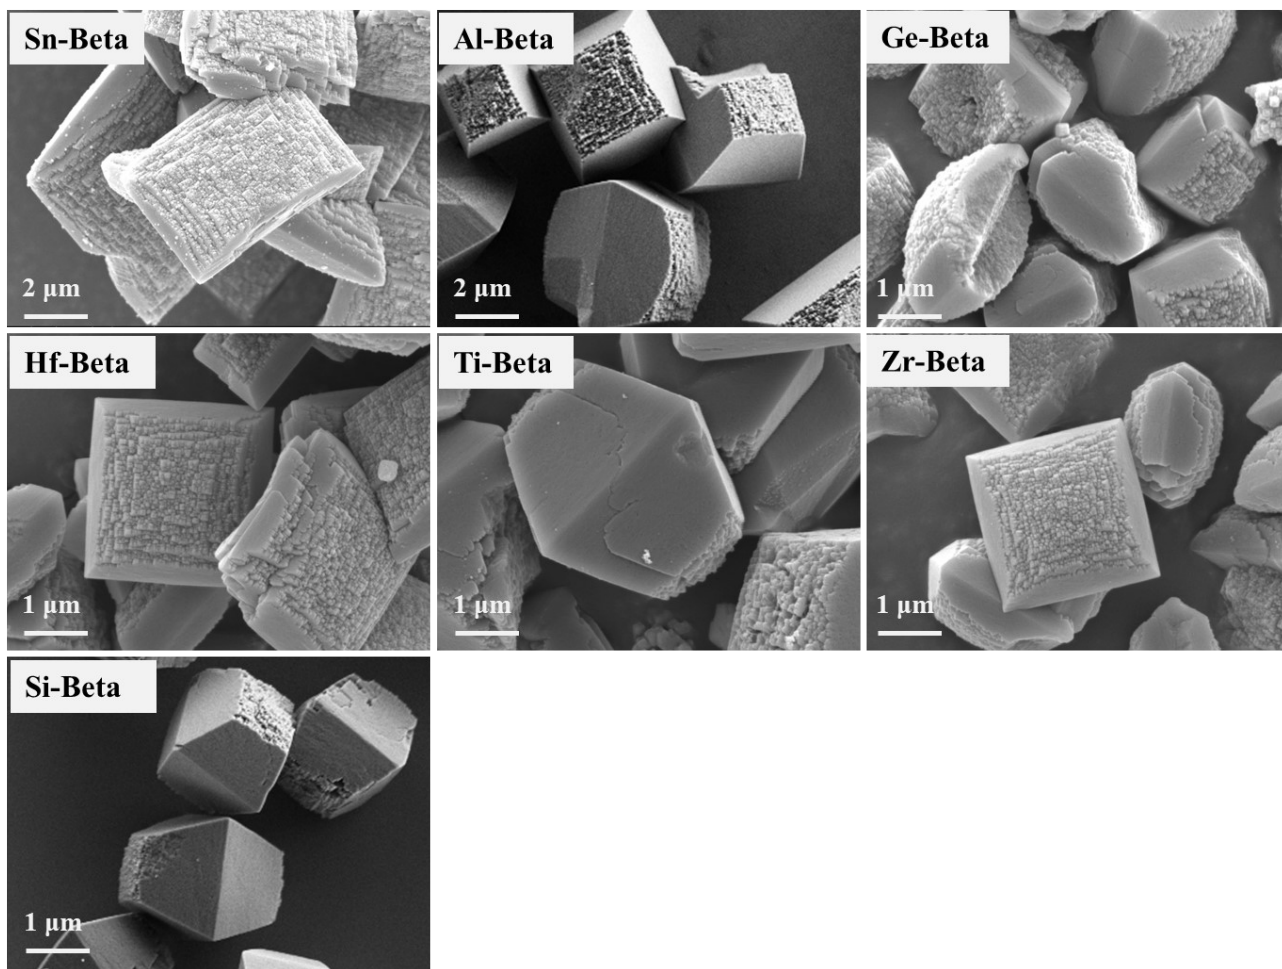

Figure S3 SEM images of representative Beta zeotype supports.

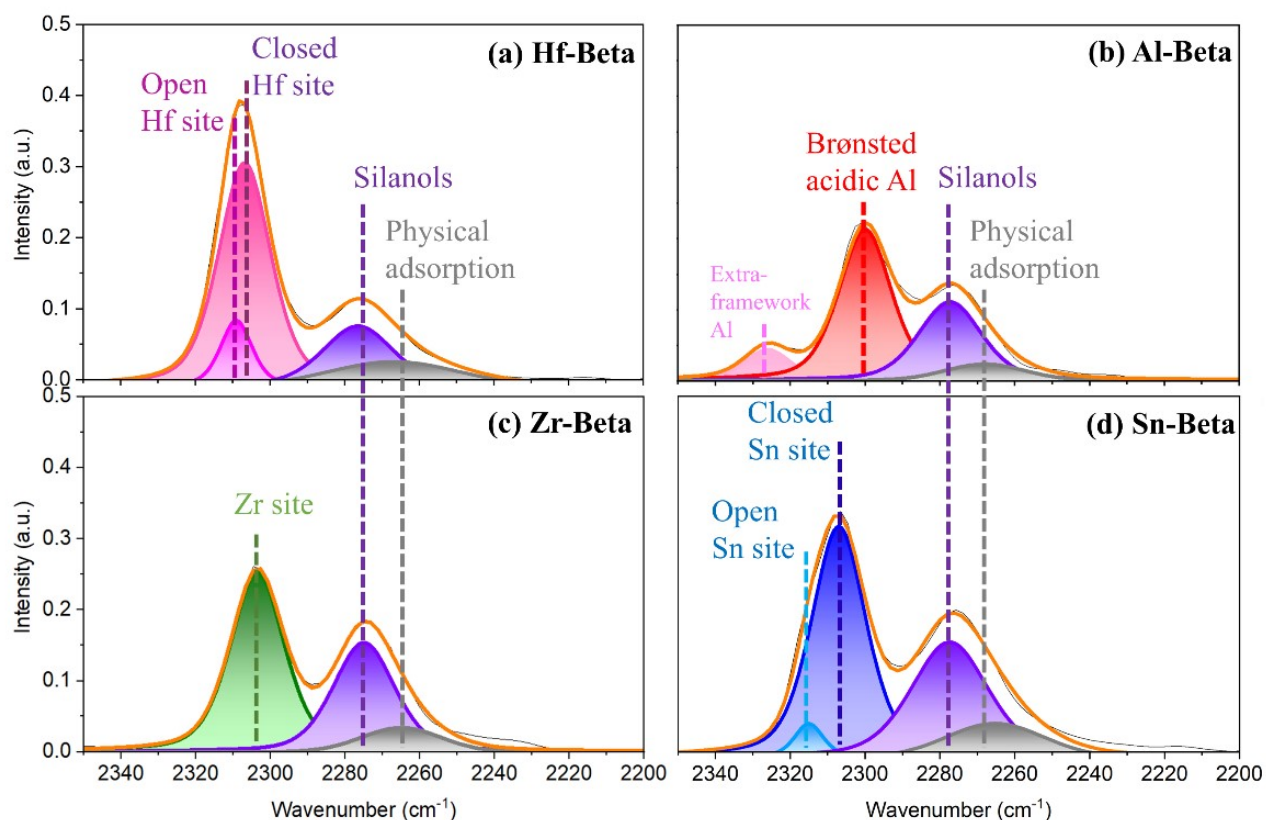

Figure S4 IR spectra within C≡N stretching region for CD<sub>3</sub>CN adsorbed over M-Beta zeotypes.

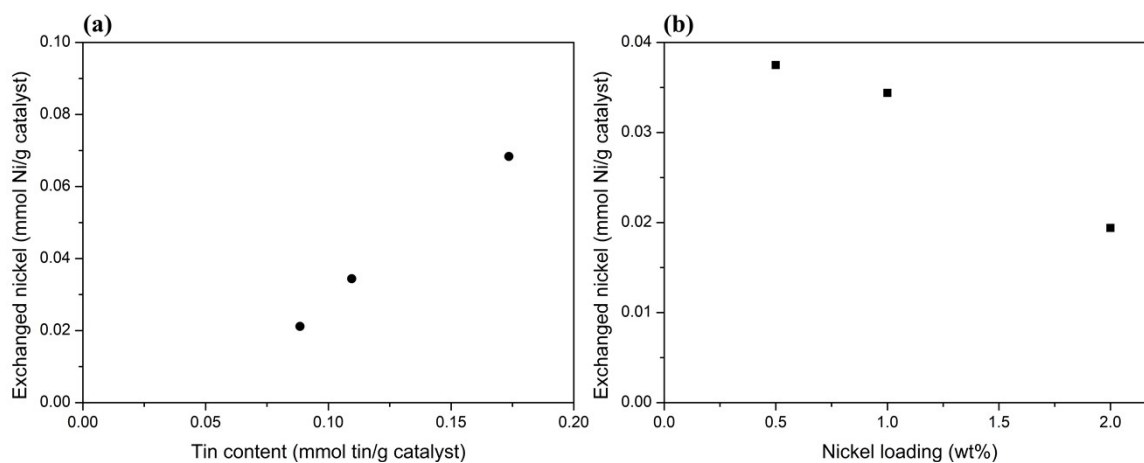

Figure S5 Correlation between exchanged nickel content and (a) tin content of Sn-Beta support, as well as (b) nickel loading of Ni/Sn-Beta catalysts.

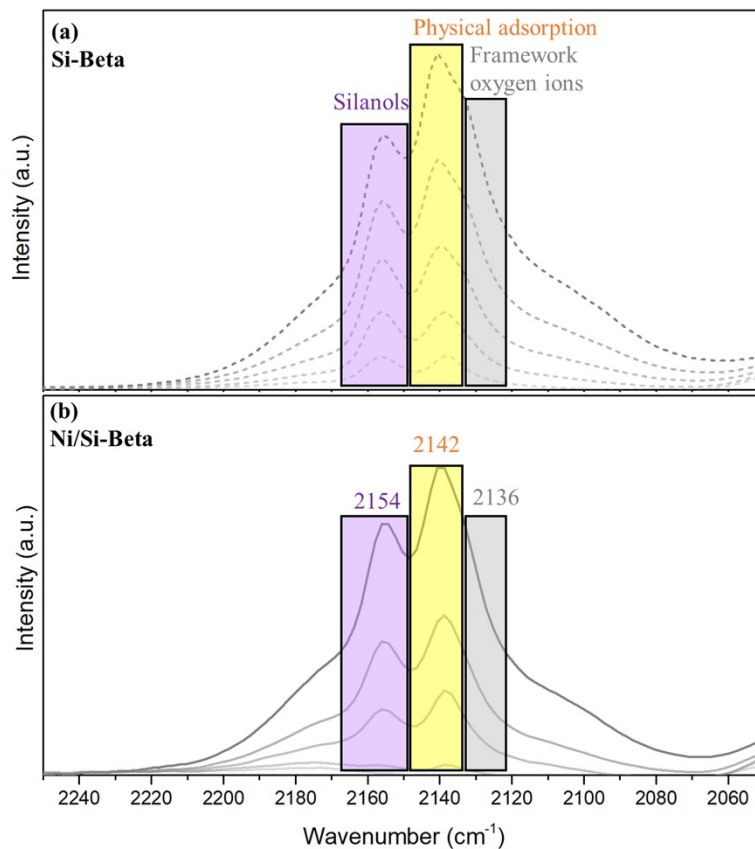

Figure S6 FTIR CO vibration region of Si-Beta (heteroatom-free) with and without nickel loading upon CO adsorption at liquid nitrogen temperature.

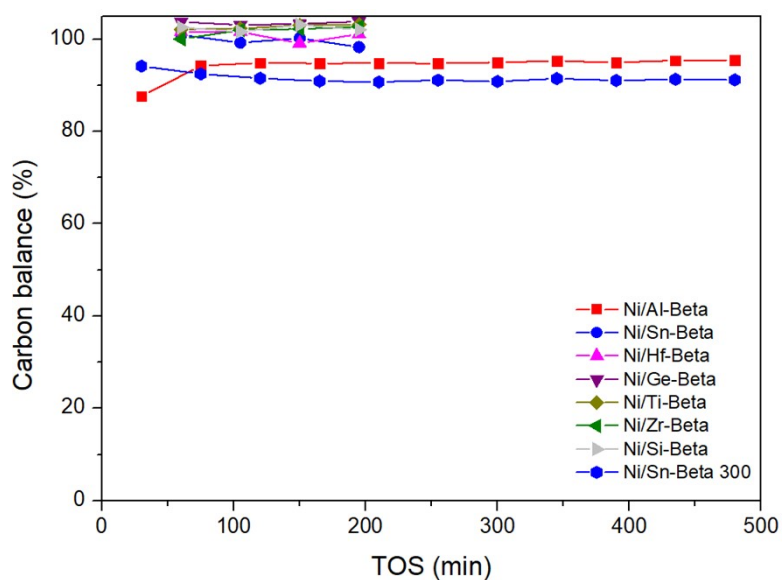

Figure S7 Carbon balance calculated based on carbon atoms.

Reference reaction conditions: 30 bar total pressure,  $P_{\text{ethylene}} = 10$  bar,  $T = 250$  °C and contact time of  $0.017$  min  $g_{\text{cat}}/\text{mL}$ .

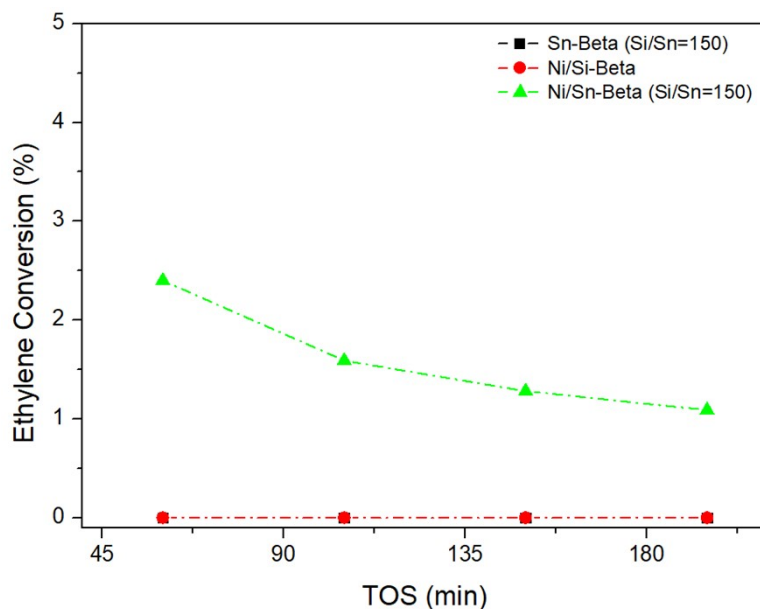

Figure S8 Ethylene conversion over Sn-Beta (nickel-free), Ni/Si-Beta (heteroatom free) and Ni/Sn-Beta catalysts.

Reference reaction conditions: 30 bar total pressure,  $P_{\text{ethylene}} = 10$  bar,  $T = 250$  °C and contact time of 0.017 min  $g_{\text{cat}}/mL$ .

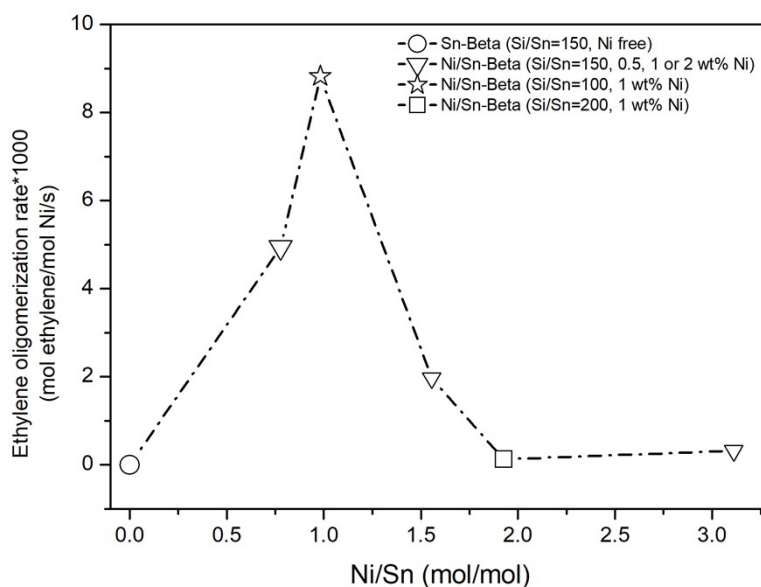

Figure S9 TOF comparison of Ni/Sn-Beta with various nickel to tin ratios with TOS=60 min.

Reference reaction conditions: 30 bar total pressure,  $P_{\text{ethylene}} = 10$  bar,  $T = 250$  °C and contact time of 0.017 min  $g_{\text{cat}}/mL$ .

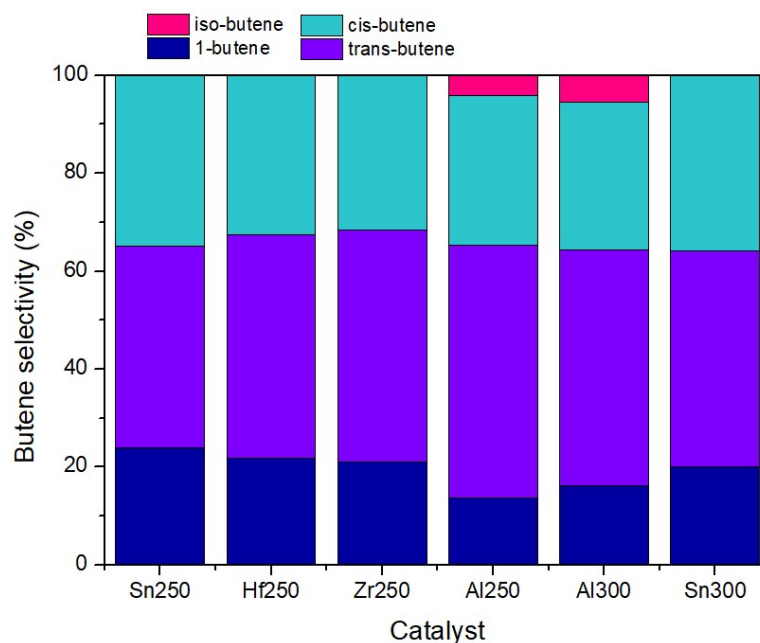

Figure S10 Butene product distribution obtained from ethylene oligomerization over Ni/M-Beta catalysts.

Reference reaction conditions: 30 bar total pressure,  $P_{\text{ethylene}} = 10$  bar,  $T = 250$  °C and contact time of 0.017 min  $g_{\text{cat}}/mL$ .

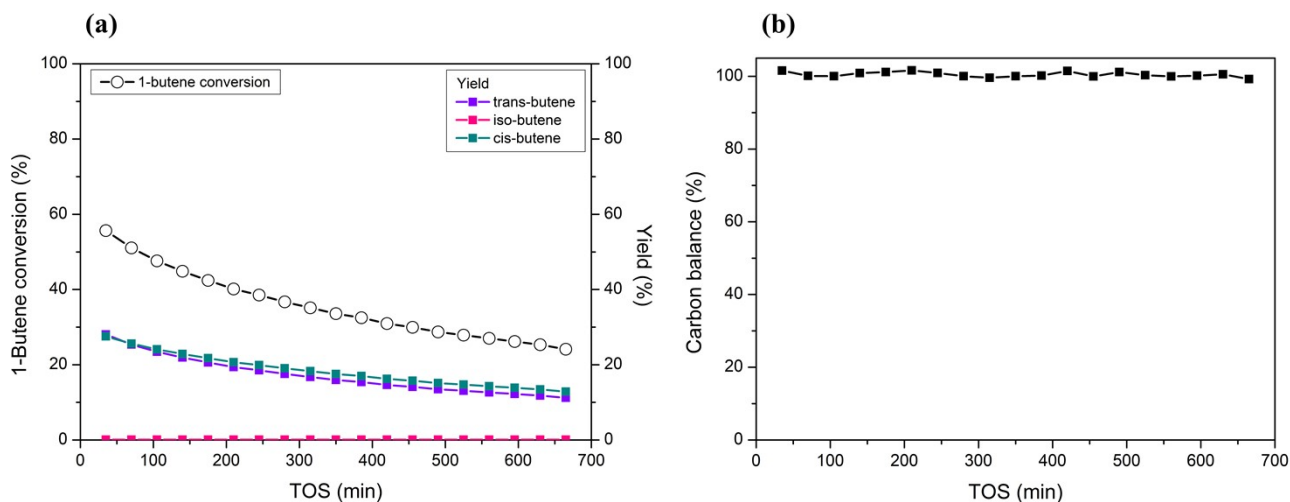

Figure S11 Results of 1-butene isomerization experiment.

(a) 1-butene conversion and yield of butene isomers; (b) carbon balance of the reaction. Reference reaction conditions: atmospheric pressure,  $T = 250$  °C and contact time of 0.0083 min  $g_{\text{cat}}/mL$ .



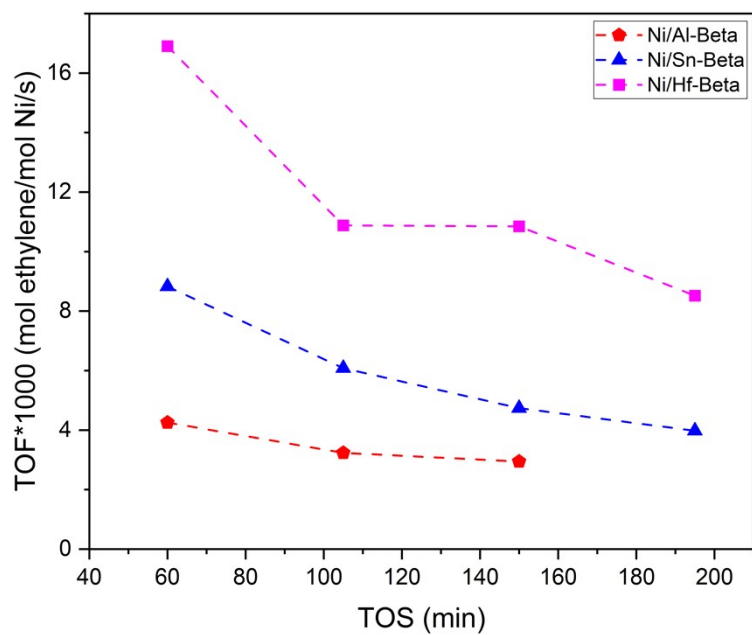

Figure S12 TOF-TOS profiles of catalysts for TPO experiments.

Reference reaction conditions: 30 bar total pressure,  $P_{\text{ethylene}} = 10$  bar,  $T = 250$  °C and contact time of  $0.017 \text{ min g}_{\text{cat}}/\text{mL}$ .

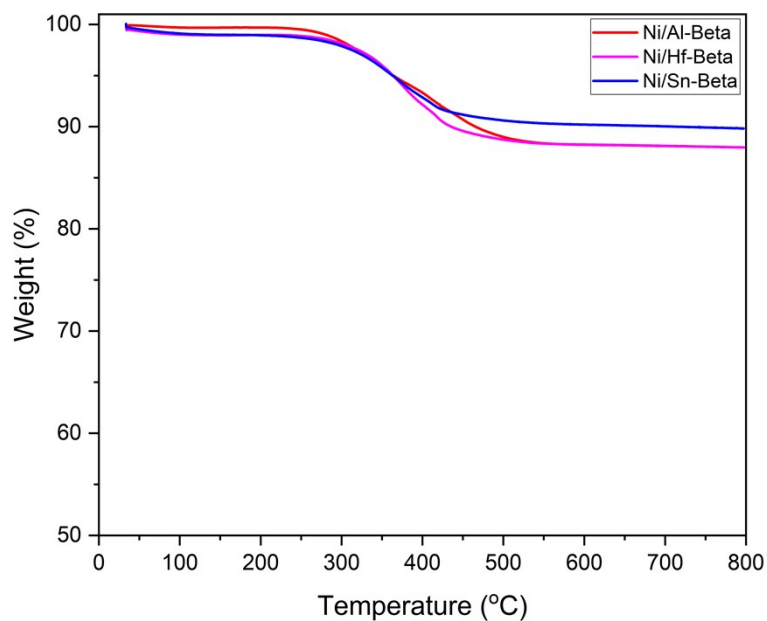

Figure S13 Weight change profile of TPO experiments.

Table S1 Textural properties of representative Ni/M-Beta catalysts.

| Entry | Sample           | Nominal Ni loading (wt%) | Surface Area (m <sup>2</sup> /g) | Micropore volume (cc/g) |
|-------|------------------|--------------------------|----------------------------------|-------------------------|
| 1     | 0.5Ni/150Sn-Beta | 0.5                      | 579                              | 0.21                    |
| 2     | 1Ni/150Sn-Beta   | 1                        | 583                              | 0.21                    |
| 3     | 2Ni/150Sn-Beta   | 2                        | 583                              | 0.21                    |
| 4     | 1Ni/100Sn-Beta   | 1                        | 578                              | 0.21                    |
| 5     | 1Ni/100Zr-Beta   | 1                        | 587                              | 0.22                    |
| 6     | 1Ni/100Hf-Beta   | 1                        | 573                              | 0.21                    |
| 7     | 1Ni/100Al-Beta   | 1                        | 591                              | 0.21                    |
| 8     | 1Ni/Si-Beta      | 1                        | 537                              | 0.20                    |

Table S2 Ion exchange capacity of different zeotype supports.

| Entry | Catalyst | Heteroatom | Silicon to M | Nominal Ni loading | Exchanged | Exchanged |
|-------|----------|------------|--------------|--------------------|-----------|-----------|
|-------|----------|------------|--------------|--------------------|-----------|-----------|

|    |             | content            | ratio            |     |        | Ni     | Ni/heteroatom |
|----|-------------|--------------------|------------------|-----|--------|--------|---------------|
|    |             | mmol/g             |                  | wt% | mmol/g | mmol/g |               |
| 1  | Ni/Sn-Beta  | 0.174              | 94               | 1   | 0.170  | 0.068  | 0.39          |
| 2  | Ni/Zr-Beta  | 0.143              | 110              | 1   | 0.170  | 0.044  | 0.31          |
| 3  | Ni/Ti-Beta  | 0.131              | 123              | 1   | 0.170  | 0.008  | 0.06          |
| 4  | Ni/Al-Beta  | 0.110<br>(nominal) | 150<br>(nominal) | 1   | 0.170  | 0.043  | 0.39          |
| 5  | Ni/Si-Beta  | 0                  | -                | 1   | 0.170  | 0.008  | -             |
| 6  | Ni/Sn-Beta  | 0.088              | 185              | 1   | 0.170  | 0.021  | 0.24          |
| 7  | Ni/Sn-Beta  | 0.110              | 150              | 0.5 | 0.085  | 0.037  | 0.34          |
| 8  | Ni/Sn-Beta  | 0.110              | 150              | 1   | 0.170  | 0.034  | 0.31          |
| 9  | Ni/Sn-Beta  | 0.110              | 150              | 2   | 0.341  | 0.019  | 0.18          |
| 10 | NiO/Sn-Beta | 0.110              | 150              | 1   | 0.170  | 0.002  | 0.02          |

Table S3 Total mass loss of catalyst samples after TPO experiments under air atmosphere.

| Entry | Sample                    | Mass loss (%) |
|-------|---------------------------|---------------|
| 1     | Ni/Al-Beta (300 °C, used) | 12.0          |
| 2     | Ni/Al-Beta (250 °C, used) | 11.6          |
| 3     | Ni/Hf-Beta (250 °C, used) | 12.0          |
| 4     | Ni/Sn-Beta (250 °C, used) | 10.2          |
| 5     | Ni/Sn-Beta (Fresh)        | 0.4           |
